# Supplementary material
Source: PubMed Central journal article supplement (PMC1904354)

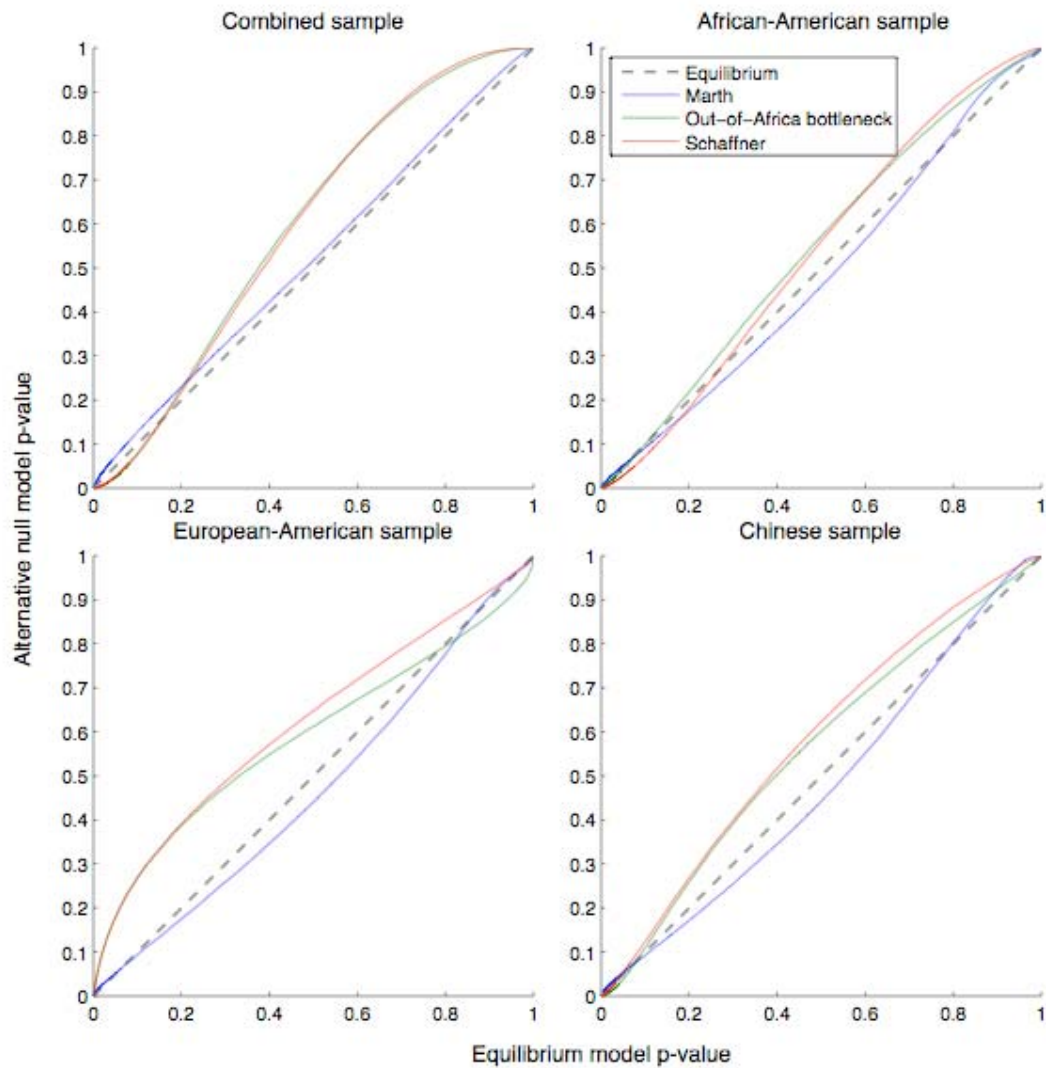

Supplement: pgen.0030090.sg001.pdf [file pgen.0030090.sg001.pdf]
